# Supplementary material for: Global Burden And Trends of Lung Cancer Incidence And Mortality
Source: Research Square preprint supplement (doi:10.21203/rs.3.rs-1246650/v1), 2022-02-02
Supplement: Supplementary file 1 [file 9eb734fbcdd1217d5b3b15cc.docx]

**Table S1** Male lung cancer incidence trends by countries and age, 2000 to 2012

| **Countries** | **Age** | **Trend 1** | |  | **Trend2** | |  | **Trend3** | | | **AAPC** |
| --- | --- | --- | --- | --- | --- | --- | --- | --- | --- | --- | --- |
| **(years)** | **Period** | **APC** |  | **Period** | **APC** |  | **Period** | **APC** |  | **2000-2012** |
| China | ASIR | 2000-2009 | -2.5*(-2.9,-2.2) |  | 2009-2012 | -0.3(-2.2,1.6) |  |  |  |  | -2.0*(-2.4,-1.5) |
| China | <40 | 2000-2012 | -3.2*(-5.5,-0.9) |  |  |  |  |  |  |  | -3.2*(-5.5,-0.9) |
| China | 40-49 | 2000-2007 | 0.6(-1.3,2.5) |  | 2007-2012 | -4.7*(-7.7,-1.5) |  |  |  |  | -1.6*(-3.1,-0.2) |
| China | 50-59 | 2000-2009 | -0.1(-1.0,0.9) |  | 2009-2012 | 6.2*(0.7,11.9) |  |  |  |  | 1.5*(0.2,2.8) |
| China | 60-69 | 2000-2009 | -3.9*(-4.5,-3.3) |  | 2009-2012 | 1.1(-2.2,4.6) |  |  |  |  | -2.6*(-3.4,-1.9) |
| China | 70-79 | 2000-2012 | -2.9*(-3.4,-2.3) |  |  |  |  |  |  |  | -2.9*(-3.4,-2.3) |
| China | 80+ | 2000-2012 | -2.6*(-3.3,-1.9) |  |  |  |  |  |  |  | -2.6*(-3.3,-1.9) |
| South Korea | ASIR | 2000-2012 | -1.2*(-1.6,-0.9) |  |  |  |  |  |  |  | -1.2*(-1.6,-0.9) |
| South Korea | <40 | 2000-2012 | -3.4*(-5.6,-1.1) |  |  |  |  |  |  |  | -3.4*(-5.6,-1.1) |
| South Korea | 40-49 | 2000-2012 | -1.6*(-2.7,-0.5) |  |  |  |  |  |  |  | -1.6*(-2.7,-0.5) |
| South Korea | 50-59 | 2000-2012 | -1.8*(-2.3,-1.2) |  |  |  |  |  |  |  | -1.8*(-2.3,-1.2) |
| South Korea | 60-69 | 2000-2012 | -1.1*(-1.7,-0.6) |  |  |  |  |  |  |  | -1.1*(-1.7,-0.6) |
| South Korea | 70-79 | 2000-2012 | -1.6*(-2.2,-1.0) |  |  |  |  |  |  |  | -1.6*(-2.2,-1.0) |
| South Korea | 80+ | 2000-2012 | 0.6(-0.3,1.5) |  |  |  |  |  |  |  | 0.6(-0.3,1.5) |
| America | ASIR | 2000-2003 | -0.9*(-1.9,-0.0) |  | 2003-2008 | -2.4*(-2.9,-1.8) |  | 2008-2012 | -3.8*(-4.3,-3.2) |  | -2.5*(-2.8,-2.2) |
| America | <40 | 2000-2012 | -3.9*(-4.9,-3.0) |  |  |  |  |  |  |  | -3.9*(-4.9,-3.0) |
| America | 40-49 | 2000-2003 | -0.1(-2.3,2.2) |  | 2003-2008 | -3.2*(-4.6,-1.8) |  | 2008-2012 | -8.1*(-9.4,-6.8) |  | -4.1*(-4.8,-3.4) |
| America | 50-59 | 2000-2012 | -2.4*(-2.5,-2.2) |  |  |  |  |  |  |  | -2.4*(-2.5,-2.2) |
| America | 60-69 | 2000-2005 | -1.9*(-2.4,-1.3) |  | 2005-2012 | -4.1*(-4.5,-3.8) |  |  |  |  | -3.2*(-3.4,-2.9) |
| America | 70-79 | 2000-2003 | 0.0(-0.7,0.8) |  | 2003-2007 | -1.6*(-2.3,-0.8) |  | 2007-2012 | -3.3*(-3.6,-2.9) |  | -1.9*(-2.1,-1.6) |
| America | 80+ | 2000-2005 | 1.0*(0.4,1.6) |  | 2005-2009 | -0.9(-2.1,0.4) |  | 2009-2012 | -3.5*(-4.7,-2.3) |  | -0.8*(-1.2,-0.3) |
| United Kingdom | ASIR | 2000-2003 | -3.6*(-5.2,-1.8) |  | 2003-2012 | -0.8*(-1.1,-0.5) |  |  |  |  | -1.5*(-1.9,-1.1) |
| United Kingdom | <40 | 2000-2012 | -0.2(-2.0,1.5) |  |  |  |  |  |  |  | -0.2(-2.0,1.5) |
| United Kingdom | 40-49 | 2000-2003 | -7.1(-13.9,0.2) |  | 2003-2012 | -1.2(-2.6,0.2) |  |  |  |  | -2.7*(-4.5,-0.9) |
| United Kingdom | 50-59 | 2000-2012 | -1.8*(-2.1,-1.5) |  |  |  |  |  |  |  | -1.8*(-2.1,-1.5) |
| United Kingdom | 60-69 | 2000-2012 | -1.6*(-1.9,-1.2) |  |  |  |  |  |  |  | -1.6*(-1.9,-1.2) |
| United Kingdom | 70-79 | 2000-2002 | -5.1(-10.3,0.4) |  | 2002-2009 | -1.7*(-2.6,-0.7) |  | 2009-2012 | 1.2(-1.6,4.1) |  | -1.5*(-2.5,-0.6) |
| United Kingdom | 80+ | 2000-2003 | -2.6(-5.3,0.3) |  | 2003-2007 | 2.2(-0.7,5.2) |  | 2007-2012 | 1.0(-2.3,0.2) |  | -0.4(-1.4,0.6) |
| Australia | ASIR | 2000-2012 | -1.3*(-1.7,-0.9) |  |  |  |  |  |  |  | -1.3*(-1.7,-0.9) |
| Australia | <40 | 2000-2012 | -0.3(-2.3,1.8) |  |  |  |  |  |  |  | -0.3(-2.3,1.8) |
| Australia | 40-49 | 2000-2012 | -0.3(-2.1,1.6) |  |  |  |  |  |  |  | -0.3(-2.1,1.6) |
| Australia | 50-59 | 2000-2012 | -1.7*(-2.2,-1.3) |  |  |  |  |  |  |  | -1.7*(-2.2,-1.3) |
| Australia | 60-69 | 2000-2012 | -1.7*(-2.4,-1.1) |  |  |  |  |  |  |  | -1.7*(-2.4,-1.1) |
| Australia | 70-79 | 2000-2012 | -1.6*(-2.2,-1.0) |  |  |  |  |  |  |  | -1.6*(-2.2,-1.0) |
| Australia | 80+ | 2000-2012 | 0.5（-0.1,1.2） |  |  |  |  |  |  |  | 0.5（-0.1,1.2） |

APC, annual percent change; AAPC, average annual percent change; ASIR, age-standardized incidence rate using world Segi’s standard population; *, The APC or AAPC is significantly different from zero (P<0.05).

**Table S2** Female lung cancer incidence trends by countries and age, 2000 to 2012

| **Countries** | **Age** | **Trend 1** | |  | **Trend2** | |  | **Trend3** | |  | **AAPC** |
| --- | --- | --- | --- | --- | --- | --- | --- | --- | --- | --- | --- |
| **(years)** | **Period** | **APC** |  | **Period** | **APC** |  | **Period** | **APC** |  | **2000-2012** |
| China | ASIR | 2000-2008 | -1.4*(-2.6,-0.3) |  | 2008-2012 | 2.7(-0.8,6.2) |  |  |  |  | -0.1(-1.3,1.1) |
| China | <40 | 2000-2002 | -22.8(-50.4,20.3) |  | 2002-2012 | 2.9(-0.6,6.5) |  |  |  |  | -1.9(-8.3,4.9) |
| China | 40-49 | 2000-2012 | 1.8*(0.9,2.8) |  |  |  |  |  |  |  | 1.8*(0.9,2.8) |
| China | 50-59 | 2000-2009 | 0.0(-1.4,1.5) |  | 2009-2012 | 10.7*(2.2,19.8) |  |  |  |  | 2.6*(0.6,4.6) |
| China | 60-69 | 2000-2009 | -2.4*(-4.0,-0.8) |  | 2009-2012 | 6.6(-2.5,16.6) |  |  |  |  | -0.2(-2.4,2.0) |
| China | 70-79 | 2000-2012 | -1.2*(-2.0,-0.5) |  |  |  |  |  |  |  | -1.2*(-2.0,-0.5) |
| China | 80+ | 2000-2012 | -1.9*(-2.4,-1.3) |  |  |  |  |  |  |  | -1.9*(-2.4,-1.3) |
| South Korea | ASIR | 2000-2003 | -2.3(-4.8,0.3) |  | 2003-2012 | 2.3*(1.8,2.8) |  |  |  |  | 1.1*(0.5,1.8) |
| South Korea | <40 | 2000-2012 | 2.0(-0.4,4.6) |  |  |  |  |  |  |  | 2.0(-0.4,4.6) |
| South Korea | 40-49 | 2000-2012 | 3.2*(1.8,4.7) |  |  |  |  |  |  |  | 3.2*(1.8,4.7) |
| South Korea | 50-59 | 2000-2012 | 2.8*(1.7,4.1) |  |  |  |  |  |  |  | 2.8*(1.7,4.1) |
| South Korea | 60-69 | 2000-2004 | -4.0*(-7.4,-0.5) |  | 2004-2012 | 4.1*(2.8,5.4) |  |  |  |  | 1.3*(0.1,2.6) |
| South Korea | 70-79 | 2000-2012 | -0.3(-1.0,0.3) |  |  |  |  |  |  |  | -0.3(-1.0,0.3) |
| South Korea | 80+ | 2000-2012 | 1.2*(0.2,2.2) |  |  |  |  |  |  |  | 1.2*(0.2,2.2) |
| America | ASIR | 2000-2006 | 0.4(-0.1,0.8) |  | 2006-2012 | -2.2*(-2.6,-1.7) |  |  |  |  | -0.9*(-1.2,-0.7) |
| America | <40 | 2000-2012 | -3.6*(-4.4,-2.8) |  |  |  |  |  |  |  | -3.6*(-4.4,-2.8) |
| America | 40-49 | 2000-2005 | 2.9*(1.5,4.3) |  | 2005-2009 | -2.4(-5.4,0.7) |  | 2009-2012 | -7.0*(-9.8,-4.0) |  | -1.4*(-2.5,-0.3) |
| America | 50-59 | 2000-2007 | -1.7*(-2.2,-1.2) |  | 2007-2012 | -0.1(-0.9,0.8) |  |  |  |  | -1.0*(-1.4,-0.6) |
| America | 60-69 | 2000-2006 | -0.3(-0.9,0.2) |  | 2006-2012 | -3.4*(-4.0,-2.9) |  |  |  |  | -1.9*(-2.2,-1.6) |
| America | 70-79 | 2000-2005 | 2.0*(1.3,2.7) |  | 2005-2008 | -0.3(-3.3,2.8) |  | 2008-2012 | -1.9*(-2.9,-1.0) |  | 0.1(-0.6,0.8) |
| America | 80+ | 2000-2003 | 4.3*(2.8,5.9) |  | 2003-2009 | 1.8*(1.1,2.5) |  | 2009-2012 | -3.0*(-4.5,-1.5) |  | 1.2*(0.7,1.7) |
| United Kingdom | ASIR | 2000-2002 | -1.6(-4.3,1.1) |  | 2002-2012 | 2.0*(1.8,2.2) |  |  |  |  | 1.4*(1.0,1.8) |
| United Kingdom | <40 | 2000-2012 | 0.9(-2.1,4.0) |  |  |  |  |  |  |  | 0.9(-2.1,4.0) |
| United Kingdom | 40-49 | 2000-2012 | -1.1*(-2.1,-0.1) |  |  |  |  |  |  |  | -1.1*(-2.1,-0.1) |
| United Kingdom | 50-59 | 2000-2006 | 1.8*(0.5,3.1) |  | 2006-2012 | 0.1(-1.2,1.4) |  |  |  |  | 1.0*(0.2,1.7) |
| United Kingdom | 60-69 | 2000-2002 | -3.4(-8.0,1.4) |  | 2002-2005 | 4.0(-1.0,9.2) |  | 2005-2012 | 2.3*(1.6,2.9) |  | 1.7*(0.6,2.9) |
| United Kingdom | 70-79 | 2000-2012 | 0.9*(0.5,1.3) |  |  |  |  |  |  |  | 0.9*(0.5,1.3) |
| United Kingdom | 80+ | 2000-2012 | 4.1*(3.5,4.7) |  |  |  |  |  |  |  | 4.1*(3.5,4.7) |
| Australia | ASIR | 2000-2012 | 1.6*(1.1,2.1) |  |  |  |  |  |  |  | 1.6*(1.1,2.1) |
| Australia | <40 | 2000-2012 | 1.7(-1.1,4.6) |  |  |  |  |  |  |  | 1.7(-1.1,4.6) |
| Australia | 40-49 | 2000-2012 | -0.4(-1.8,1.0) |  |  |  |  |  |  |  | -0.4(-1.8,1.0) |
| Australia | 50-59 | 2000-2012 | 1.0(-0.1,2.1) |  |  |  |  |  |  |  | 1.0(-0.1,2.1) |
| Australia | 60-69 | 2000-2012 | 1.7*(1.0,2.4) |  |  |  |  |  |  |  | 1.7*(1.0,2.4) |
| Australia | 70-79 | 2000-2012 | 1.7*(1.3,2.1) |  |  |  |  |  |  |  | 1.7*(1.3,2.1) |
| Australia | 80+ | 2000-2012 | 3.2*(2.2,4.1) |  |  |  |  |  |  |  | 3.2*(2.2,4.1) |

APC, annual percent change; AAPC, average annual percent change; ASIR, age-standardized incidence rate using world Segi’s standard population; *, The APC or AAPC is significantly different from zero (P<0.05).
